# Correction

# Correction: BRK Targets Dok1 for Ubiquitin-Mediated Proteasomal Degradation to Promote Cell Proliferation and Migration

The PLOS ONE Staff

Figure 7 is incorrect. The authors have provided a corrected version here. The publisher apologizes for this error.

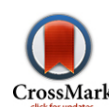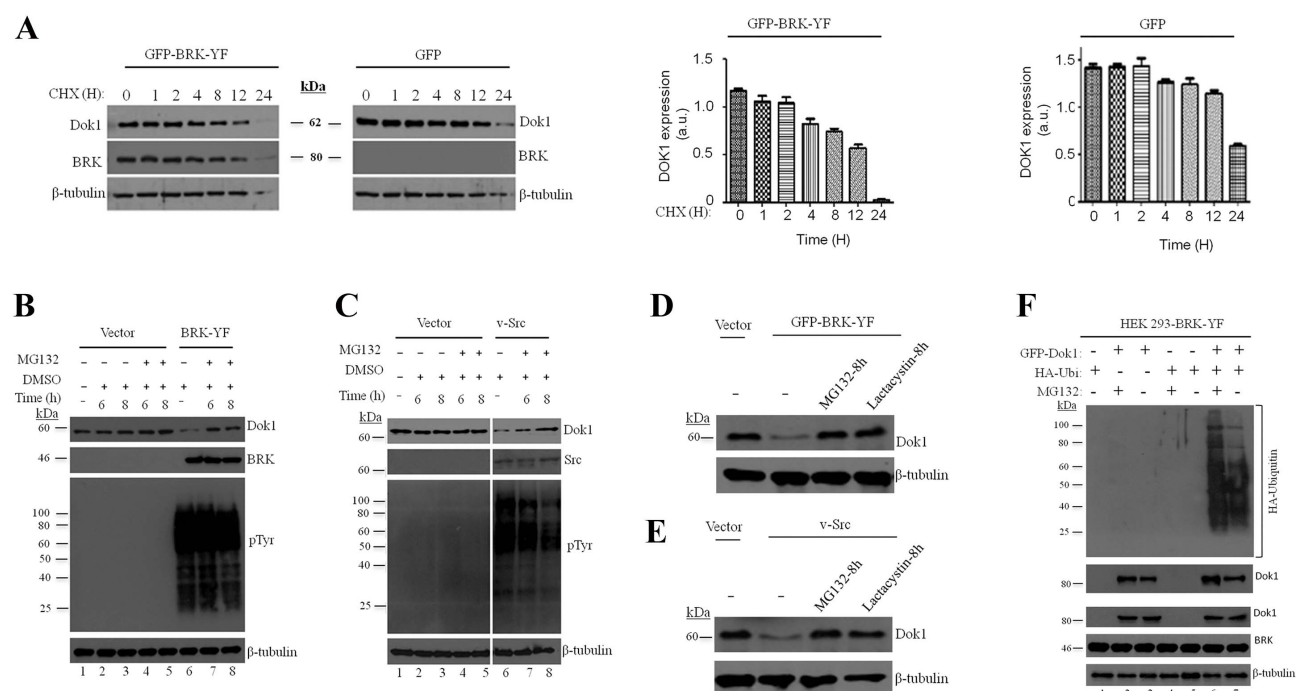

**Figure 7: Activated BRK downregulates Dok1 by reducing its stability.** (A) HEK 293 cells or HEK 293-BRK-YF stable cell line were treated with a protein synthesis inhibitor cyclohexamide (CHX: 200  $\mu$ g/ml) for the indicated time points and then the cells were lysed and analyzed by immunoblotting for Dok1, BRK and  $\beta$ -tubulin as a loading control. (B) HEK 293 cells were stably transduced with HEK293-BRK-YF and treated with either a proteasome inhibitor MG132 (10  $\mu$ M) or the vehicle DMSO as the control, at different time points (above the plot). Cellular proteins were determined in total cell lysates by immunoblotting analysis with anti-Dok1, anti-BRK, anti-phosphotyrosine antibodies.  $\beta$ -tubulin was used as a loading control. (C) Empty vector or V-Src was transiently transfected into HEK293 cells and the cells treated with a proteasome inhibitor MG132 (10  $\mu$ M) and vehicle control DMSO for the indicated time points. Immunoblotting analysis of total cell lysates was performed to detect Dok1, v-Src, phosphotyrosines and  $\beta$ -tubulin served as a loading control. (D & E) HEK 293 cells were transfected with empty control vector or BRK-YF or v-Src and treated with MG132 (10  $\mu$ M) and Lactacystin (5  $\mu$ M) or control vehicle for 8 hours. Then the cell lysates were subjected to immunoblot analysis with anti-Dok1 antibody.  $\beta$ -tubulin as a loading control. (F) HEK293-BRK-YF stable cells were transiently cotransfected with Dok1 and HA-Ubiquitin plasmids and after 12 hours the cells were treated MG132 (10  $\mu$ M) for an additional 8 hours. The total cell lysates were subjected to immunoprecipitation with anti-Dok1 followed by immunoblotting analysis with anti-HA and anti-Dok1 antibodies. The inputs were analysed as indicated.

doi:10.1371/journal.pone.0087684.g007

## Reference

- Miah S, Goel R K, Dai C, Kalra N, Beaton-Brown E, et al. (2014) BRK Targets Dok1 for Ubiquitin-Mediated Proteasomal Degradation to Promote Cell Proliferation and Migration. PLoS ONE 9(2): e87684. doi:10.1371/journal.pone.0087684

**Citation:** The PLOS ONE Staff (2014) Correction: BRK Targets Dok1 for Ubiquitin-Mediated Proteasomal Degradation to Promote Cell Proliferation and Migration. PLoS ONE 9(5): e98814. doi:10.1371/journal.pone.0098814

Published May 22, 2014

**Copyright:** © 2014 The PLOS ONE Staff. This is an open-access article distributed under the terms of the Creative Commons Attribution License, which permits unrestricted use, distribution, and reproduction in any medium, provided the original author and source are credited.
